# Supplementary material for: Orthogonal effect of pyrene–porphyrin conjugates on the detection of volatile organic compounds under UV and visible light illumination through surface photovoltage
Source: Royal Society of Chemistry journal article supplement (doi:10.1039/d4ma01228c), 2025-01-01
Supplement: d4ma01228c1.pdf [file d4ma01228c1.pdf]

*Supporting Information*

**Orthogonal effect on Pyrene-Porphyrin conjugates towards the detection of Volatile Organic Compounds under UV and Visible light illumination through Surface Photovoltage**

Prasanth Palanisamy<sup>a</sup>, Mageshwari Anandan<sup>a</sup>, Sheethal Sasi<sup>b</sup>, Arbacheena Bora<sup>b</sup>, Sarath Kumar Chedharla Balaji<sup>c</sup>, Rence P Reji<sup>c</sup>, Yoshiyuki Kawazoe<sup>d,e</sup>, Kommineni Kalyani<sup>f</sup>, Surya Velappa Jayaraman<sup>c,d\*</sup>, Yuvaraj Sivalingam<sup>b,e</sup> and Venkatramaiah Nutalapati<sup>a\*</sup>

<sup>a</sup> *Functional Materials Laboratory, Department of Chemistry, Faculty of Engineering and Technology, SRM Institute of Science and Technology, Kattankulathur 603203, India.*

<sup>b</sup> *Laboratory of Sensors, Energy and Electronic Devices (Lab SEED), Department of Physics and Nanotechnology, SRM Institute of Science and Technology, Kattankulathur 603203 Tamil Nadu, India.*

<sup>c</sup> *Novel, Advanced, and Applied Materials (NAAM) Laboratory, Department of Physics and Nanotechnology, SRM Institute of Science and Technology, Kattankulathur 603203 Tamil Nadu, India.*

<sup>d</sup> *New Industry Creation Hatchery Centre (NICHe), Tohoku University, Aoba-ku, Sendai 980-8579, Miyagi, Japan.*

<sup>e</sup> *Computer, Electrical and Mathematical Sciences and Engineering Division (CEMSE), King Abdullah University of Science and Technology (KAUST), Thuwal 23955-6900, Kingdom of Saudi Arabia.*

<sup>f</sup> *Department of Chemistry, RVR&JC College of Engineering, Guntur, Andhra Pradesh 522019, India*

***To whom correspondence should be addressed***

*Dr. Venkatramaiah Nutalapati, E-mail: [nvenkat83@gmail.com](mailto:nvenkat83@gmail.com)/[venkatrv1@srmist.edu.in](mailto:venkatrv1@srmist.edu.in)*

*Dr. Surya Velappa Jayaraman, Email: [suryaj@srmist.edu.in](mailto:suryaj@srmist.edu.in).*

## **Content**

1. Structural Characterization
2. Photophysical properties
3. SKP Measurements
4. DFT

## 1. Structural Characterization

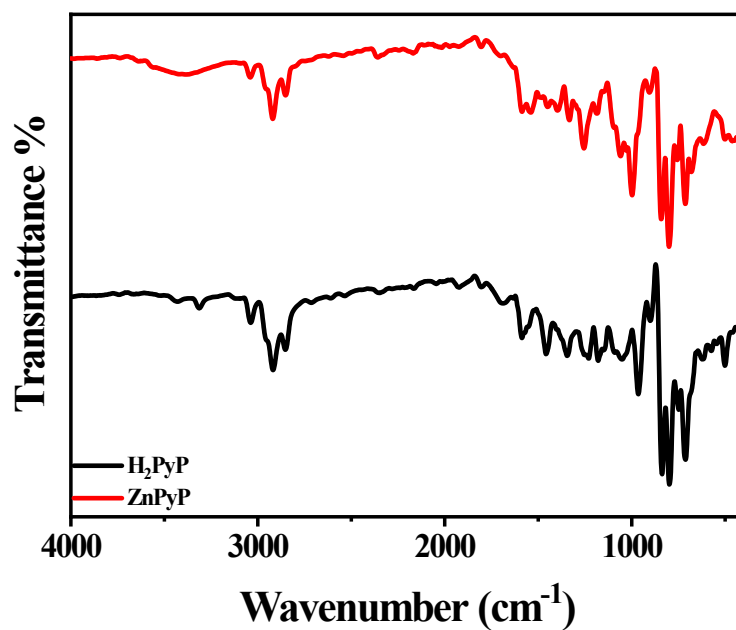

Fig. S1 Stacked FT-IR spectra of H<sub>2</sub>PyP and ZnPyP.

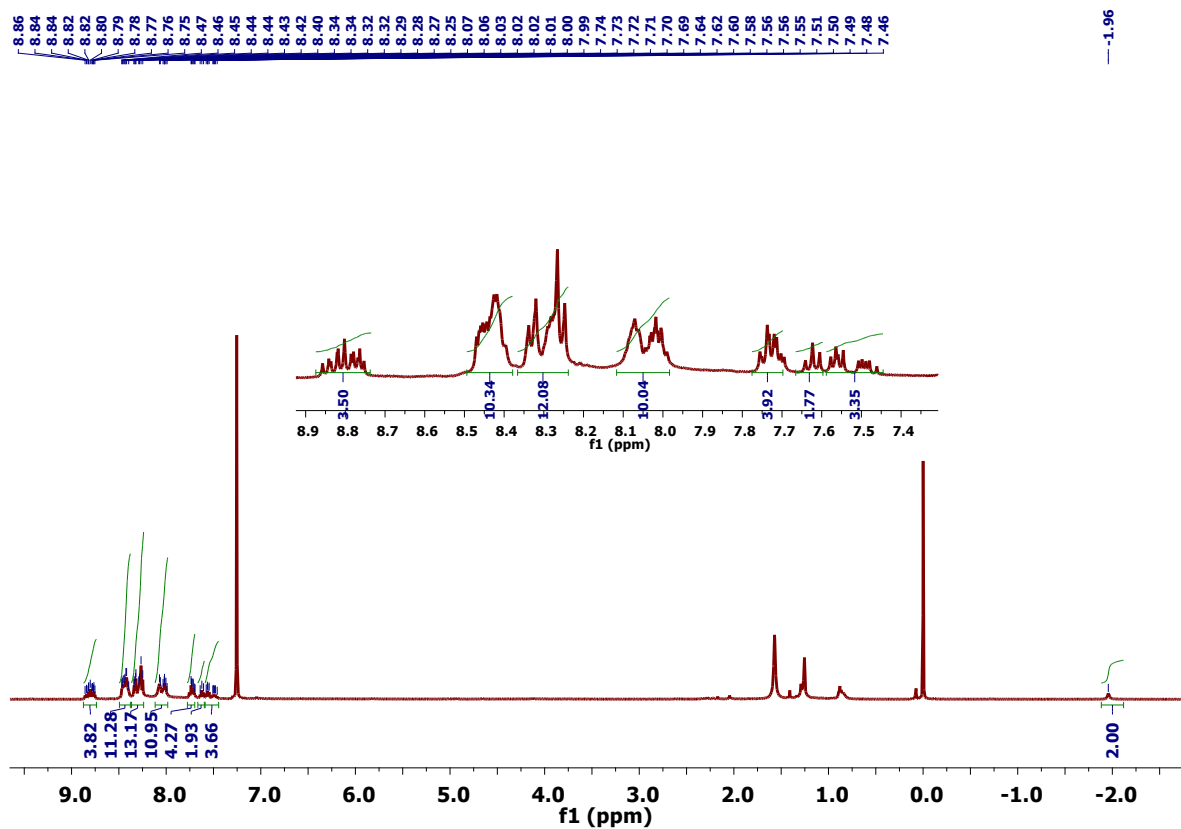

Fig. S2 <sup>1</sup>H NMR (300 MHz) of H<sub>2</sub>PyP in CDCl<sub>3</sub>.

H2PyP

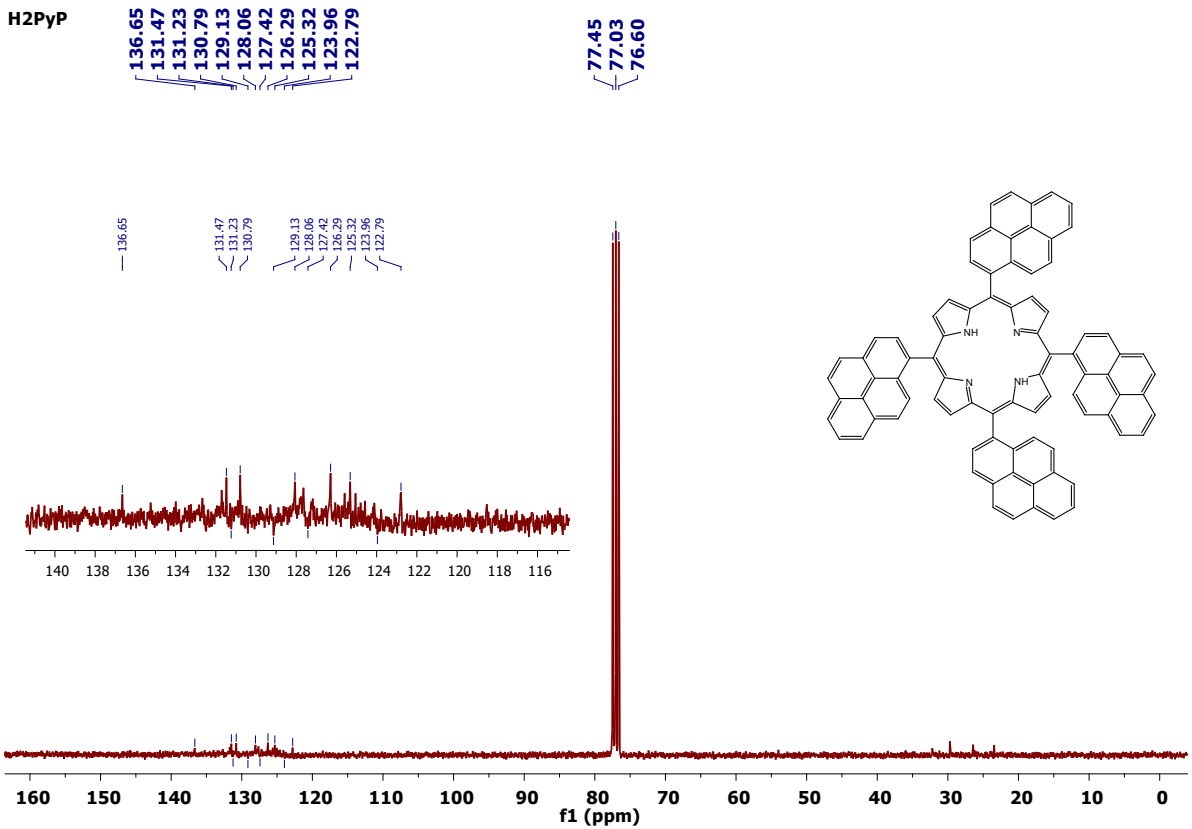

Fig. S3  $^{13}\text{C}$  NMR (75 MHz) of H<sub>2</sub>PyP in CDCl<sub>3</sub>.

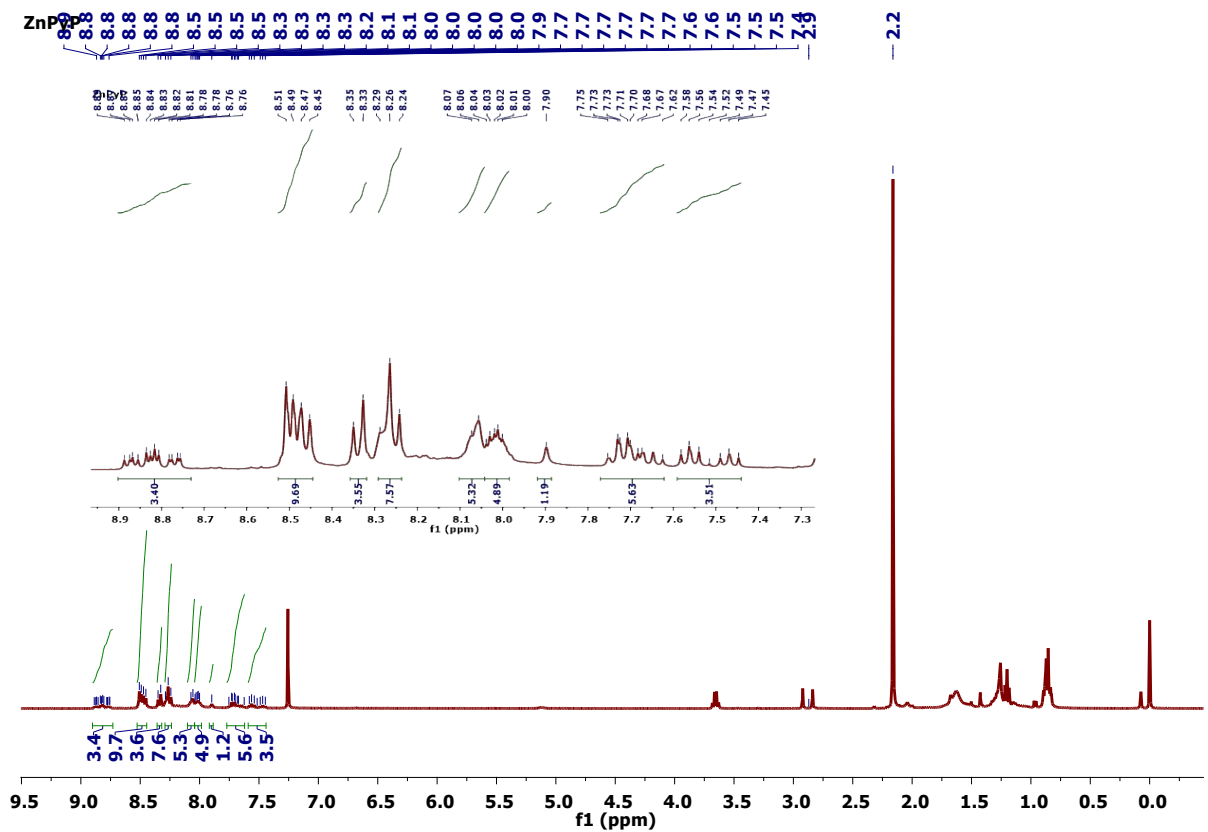

Fig. S4  $^1\text{H}$  NMR (300 MHz) of ZnPyP in  $\text{CDCl}_3$ .

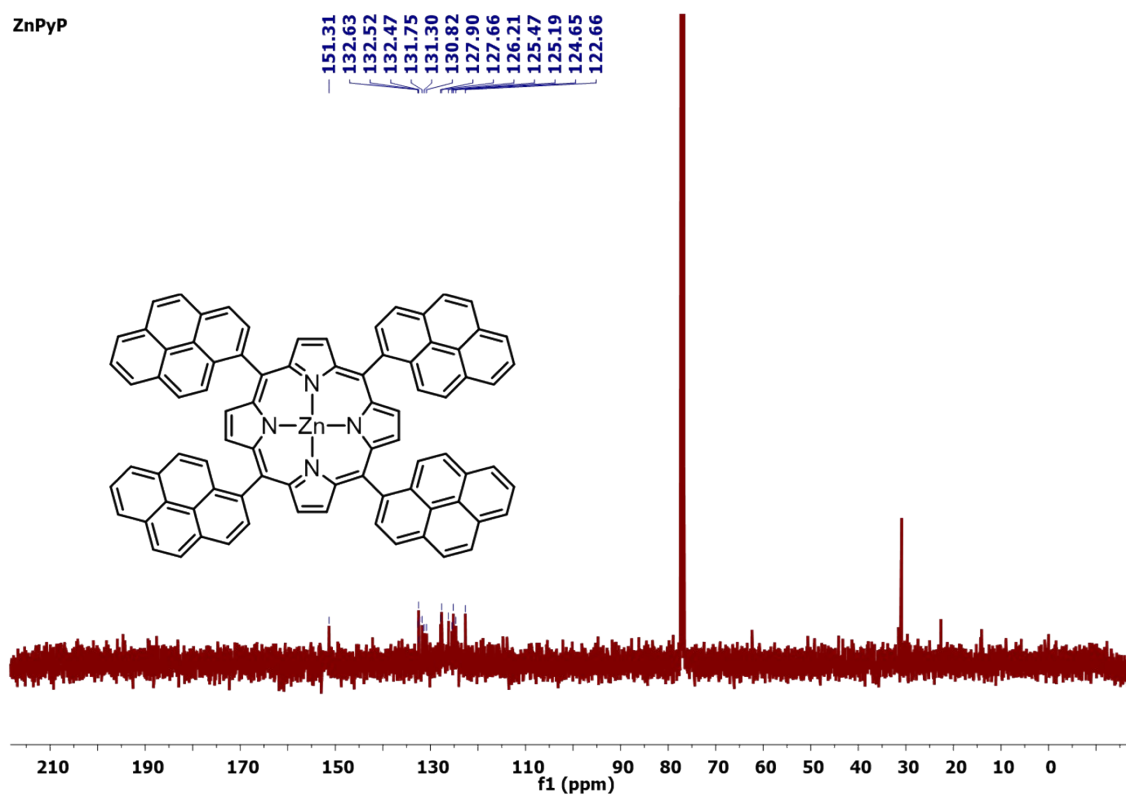

Fig. S5  $^{13}\text{C}$  NMR (75 MHz) of ZnPyP in  $\text{CDCl}_3$ .

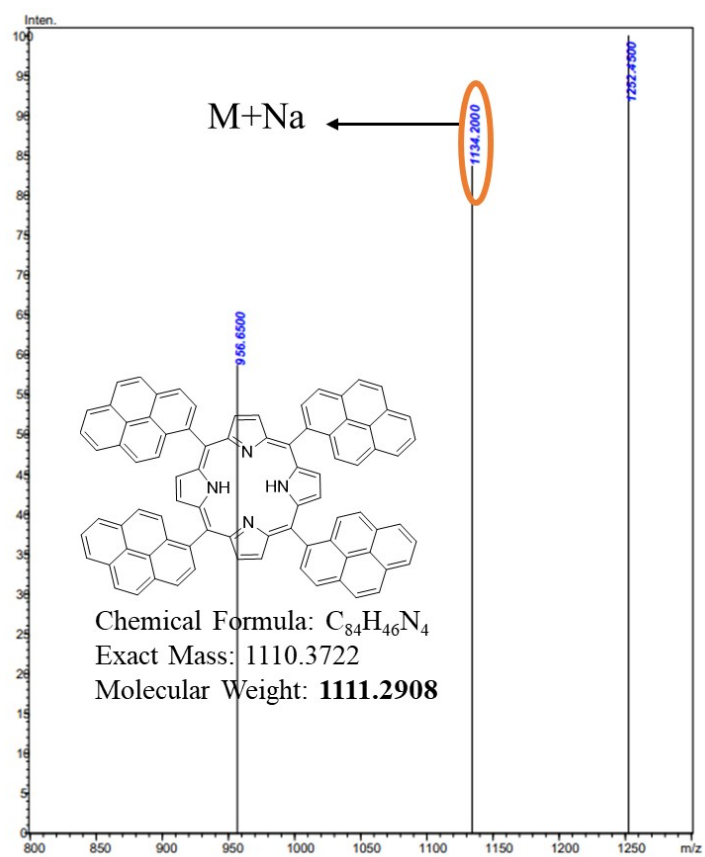

**Fig. S6** The ESI-MS of H<sub>2</sub>PyP.

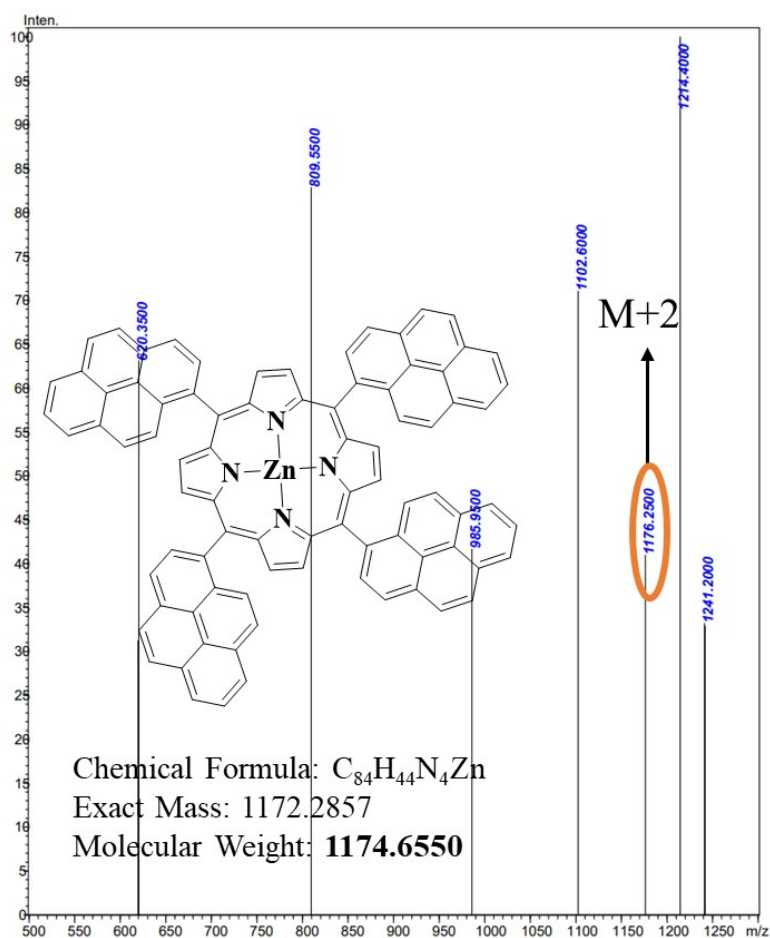

**Fig. S7** The ESI-MS of ZnPyP.

## 2. Photophysical properties

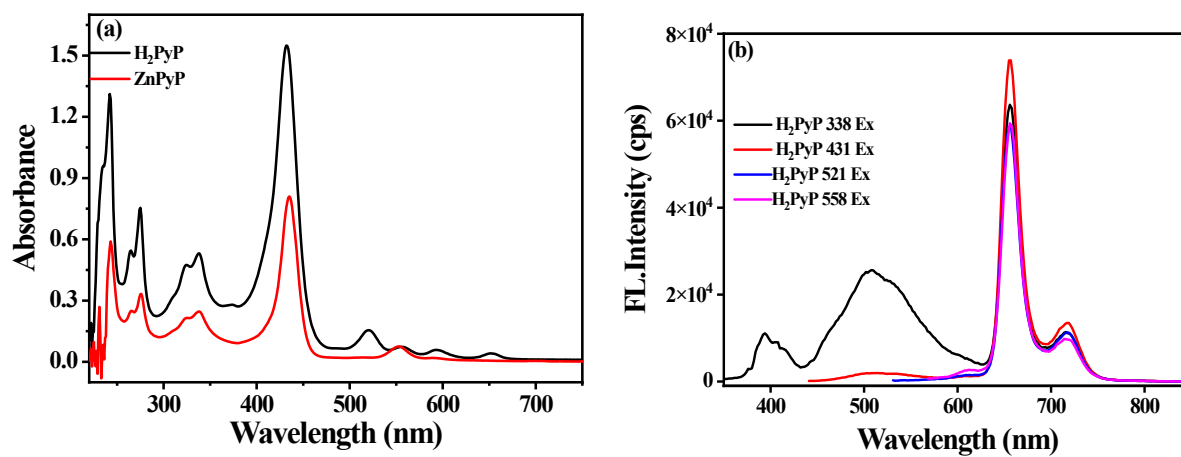

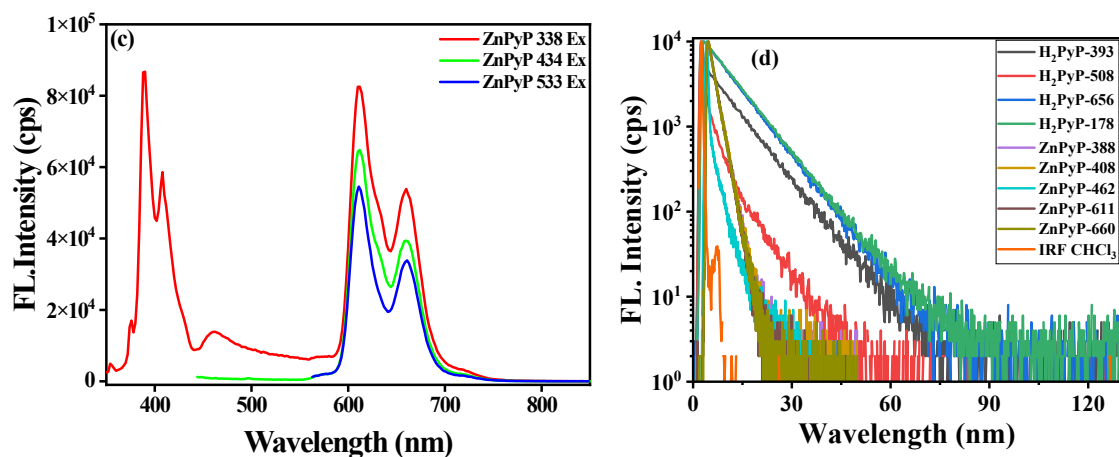

**Fig. S8** Absorption spectra of H<sub>2</sub>PyP and ZnPyP (a) in chloroform solution. Fluorescence Emission spectra of (b, c) H<sub>2</sub>PyP and ZnPyP, lifetime decay profile of (d) H<sub>2</sub>PyP and ZnPyP in solution.

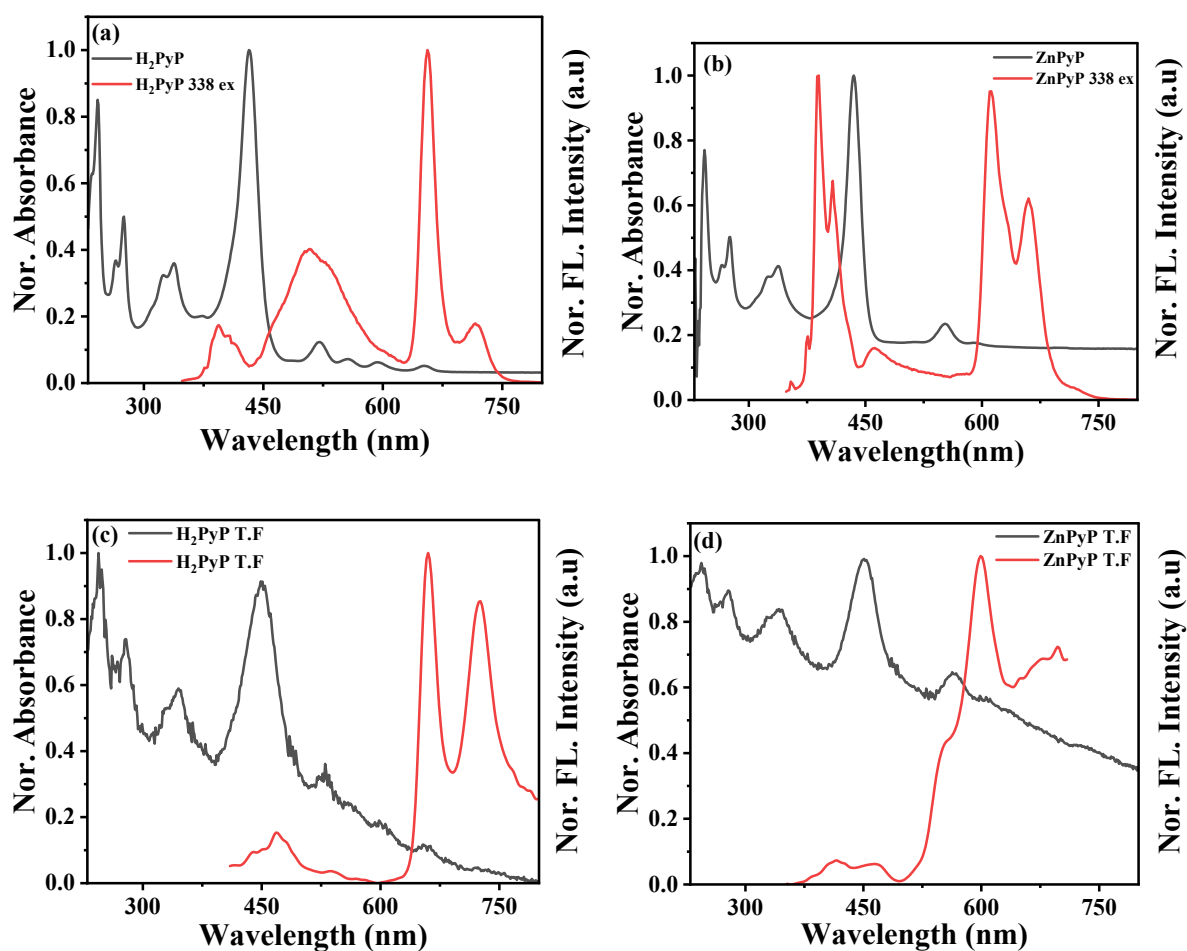

**Fig. S9** UV-visible and emission spectrum of solution and thin film H<sub>2</sub>PyP and ZnPyP comparison studies.

### 3. SKP Measurements

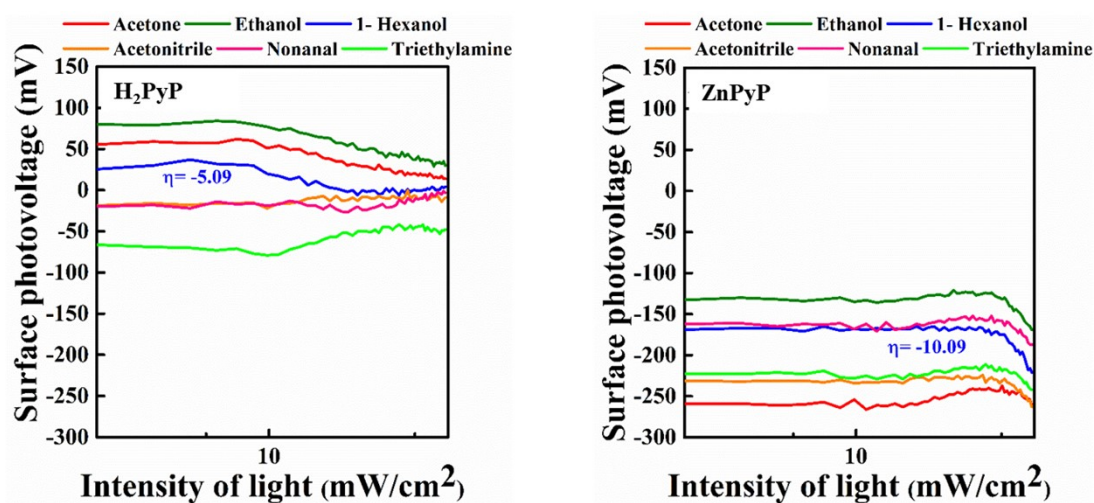

**Fig. S10** Surface photovoltage changes of H<sub>2</sub>PyP and ZnPyP under visible light illumination under various VOC media.

**Table S1.** The  $\eta$  values of H<sub>2</sub>PyP and ZnPyP under visible light illumination for various VOC atmospheres

| $\eta$             | Acetone | Ethanol  | 1-hexanol | Acetonitrile | Nonanal | Triethylamine |
|--------------------|---------|----------|-----------|--------------|---------|---------------|
| ZnPyP              | -7.218  | -4.90663 | -10.098   | -2.60796     | -8.935  | -2.617        |
| H <sub>2</sub> PyP | -0.5246 | -0.79701 | -5.0918   | -2.22788     | -4.55   | -1.67582      |

**Table. S2** Various pyrene and porphyrin derivatives have been employed previously for VOC detection

| Sl No. | Material                                          | VOCs                                    | Reference                                                                                           |
|--------|---------------------------------------------------|-----------------------------------------|-----------------------------------------------------------------------------------------------------|
| 1.     | H <sub>2</sub> TPPSH, CoTPPSH                     | Triethylamine                           | <sup>1</sup>                                                                                        |
| 2.     | Pyrene Tetratopic Ligands Layered on ZnO Nanorods | Ethanol (alcohol) and n-hexane (alkane) | <sup>2</sup>                                                                                        |
| 3      | Porphyrin-Functionalized ZnO Nanorods             | Triethylamine                           | <sup>3</sup>                                                                                        |
| 4      | Pyrene Coated ZnO Nanorods                        | Triethylamine                           | <a href="http://dx.doi.org/10.5162/IMCS2018/P2NG.20">http://dx.doi.org/10.5162/IMCS2018/P2NG.20</a> |
| 5      | triphenylamine                                    | Nonanal                                 | <sup>4</sup>                                                                                        |



|   |                                                                                      |               |   |
|---|--------------------------------------------------------------------------------------|---------------|---|
|   | derivatives<br>functionalized<br>zinc oxide<br>nanorods                              |               |   |
| 6 | multi-walled<br>carbon nanotubes<br>coated with<br>pyrene based<br>organic molecules | Triethylamine | 5 |
| 7 | porphyrin<br>functionalized<br>boron doped<br>diamond thin<br>films                  | Triethylamine | 6 |
| 8 | Triphenylamine-<br>porphyrin<br>conjugates as<br>antenna modular<br>systems          | 1-hexanol     | 7 |
| 9 | Porphyrinoid-<br>Functionalized<br>ZnO Nanoflowers                                   | Benzylamine   | 8 |

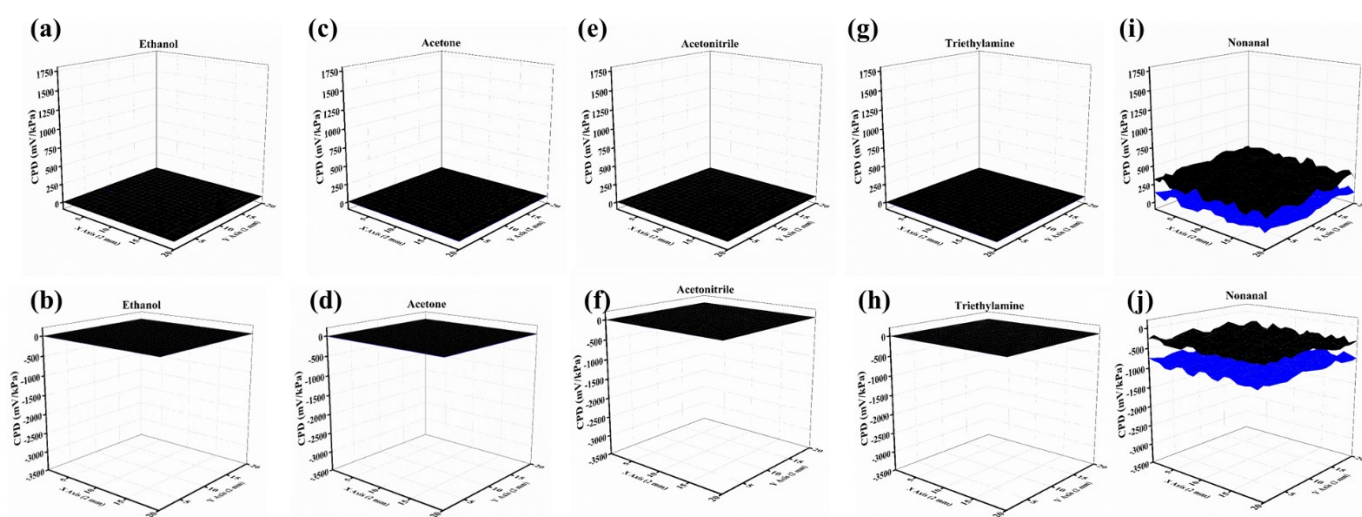

**Fig. S11** Raster scan images on dark and UV light illumination of (a, c, e, g, i) H<sub>2</sub>PyP and (b, d, f, h, j) ZnPyP under VOC exposure.

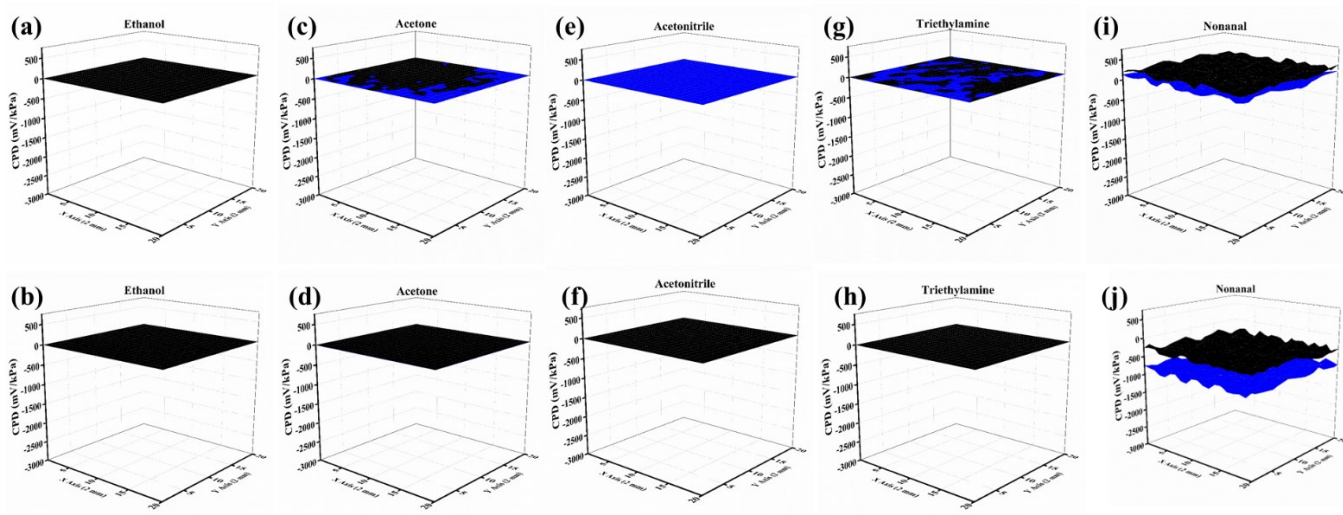

**Fig. S12** Raster scan images on dark and Visible light illumination of (a, c, e, g, i) H<sub>2</sub>PyP and (b, d, f, h, j) ZnPyP under VOC exposure.

#### 4. DFT

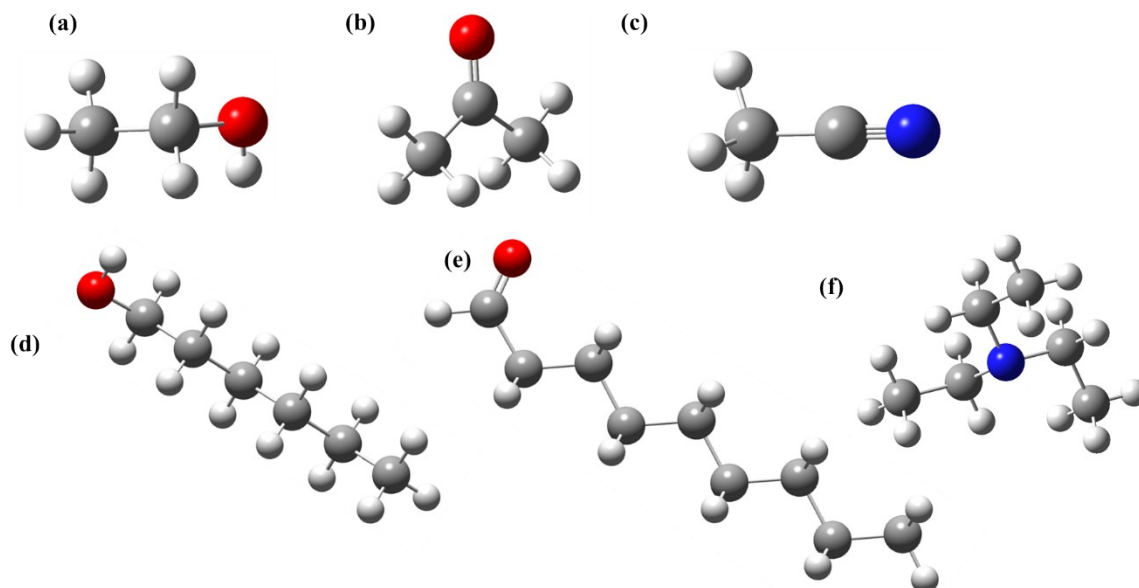

**Fig. S13** Optimised structures of (a) EtOH, (b) Acetone, (c) ACN, (d) 1-Hexanol, (e) Nonanal, and (f) TEA

**Table S3.** details on the adsorption energy of VOCs with H<sub>2</sub>PyP

| <b>Name of VOC</b> | <b>Adsorption energy (eV)</b> |
|--------------------|-------------------------------|
| Ethanol            | -0.21                         |
| Acetone            | -0.08                         |
| Acetonitrile       | -0.12                         |
| 1-hexanol          | -0.15                         |
| Nonanal            | -0.11                         |
| Triethylamine      | -0.02                         |

**Table S4.** details on the adsorption energy of VOCs with ZnPyP

| <b>Name of VOC</b> | <b>Adsorption energy (eV)</b> |
|--------------------|-------------------------------|
| Ethanol            | -0.33                         |
| Acetone            | -0.26                         |
| Acetonitrile       | -0.23                         |
| 1-hexanol          | -0.34                         |
| Nonanal            | -0.28                         |
| Triethylamine      | -0.02                         |

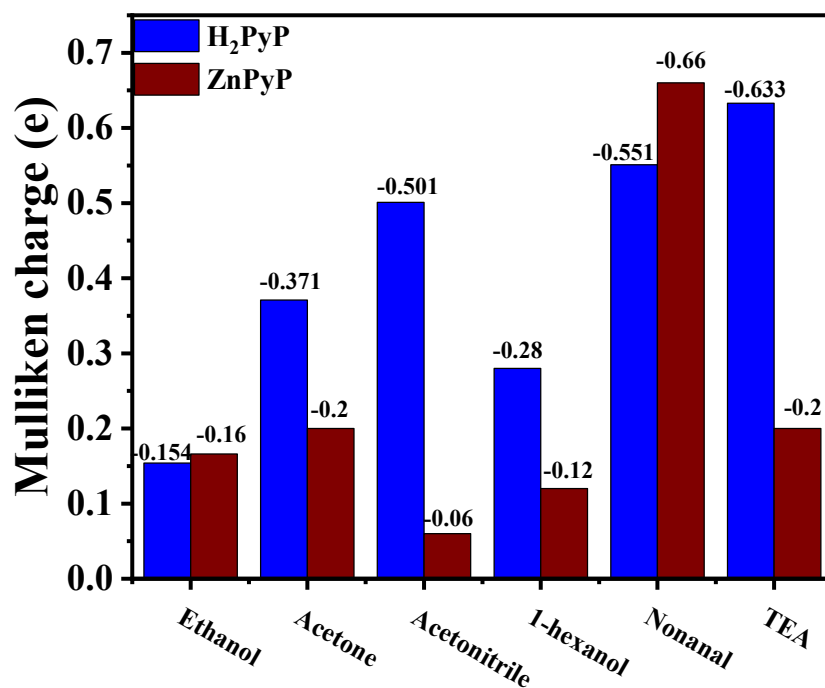

**Fig. S14** Plot of Mulliken Charge analyses in VOCs adsorbed H<sub>2</sub>PyP and ZnPyP.

## Reference

- 1 A. D. Amico, C. Di, R. Paolesse, A. Mantini, C. Goletti, F. Davide and G. Filosofi, *Sensors & Actuators: B. Chemical*, 2000, **70**, 254–262.
- 2 Y. Sivalingam, P. Elumalai, S. V. J. Yuvaraj, G. Magna, V. J. Sowmya, R. Paolesse, K. W. Chi, Y. Kawazoe and C. Di Natale, *Journal of Photochemistry and Photobiology A: Chemistry*, 2016, **324**, 62–69.
- 3 Y. Sivalingam, E. Martinelli, A. Catini, G. Magna, G. Pomarico, F. Basoli, R. Paolesse and C. Di Natale, *Procedia Engineering*, 2012, **47**, 446–449.
- 4 G. Marappan, A. K. Mia, K. Puspharaj, S. Vaidyanathan, Y. Kawazoe, Y. Sivalingam and V. J. Surya, *Surfaces and Interfaces*, 2024, **44**, 103648.
- 5 M. Elakia, M. Gobinath, Y. Sivalingam, E. Palani, S. Ghosh, V. Nutalapati and V. J. Surya, *Physica E: Low-Dimensional Systems and Nanostructures*, 2020, **124**, 114232.
- 6 S. Sasi, G. Marappan, Y. Sivalingam, M. Chandran, G. Magna, S. Velappa Jayaraman,

- R. Paolesse and C. Di Natale, *Surfaces and Interfaces*, 2024, **50**, 104456.
- 7 P. Palanisamy, M. Anandan, S. Sasi, A. Bora, R. P. Reji, C. B. S. Kumar, Y. Kawazoe, G. Raman, S. V. Jayaraman and Y. Sivalingam, *Sustainable Materials and Technologies*, 2025, e01239.
- 8 S. Sasi, P. Palanisamy, R. P. Reji, V. Nutalapati, S. V. Jayaraman, Y. Kawazoe and Y. Sivalingam, *ACS Applied Materials & Interfaces*, 2024, **16**, 61204–61217.
